# Supplementary material for: Enhancing Parental Education on Early Childhood Developmental Monitoring: A Qualitative Exploration with Stakeholders
Source: Research Square preprint supplement (doi:10.21203/rs.3.rs-6671717/v1), 2025-06-17
Supplement: Supplementary file 1 [file 6a09ac4674297d349c968fa0.docx]

**ORIENTATION**

We are conducting research to develop a educational program for pregnant mothers. This educational program aims to train the mothers to monitor their children during the first year of baby’s life. This will help the mothers to track their child’s age-appropriate development.

The purpose of the study is to gather the information from mothers of children with developmental delay on early signs of identification over child’s age appropriate development. This gathered data will be helpful in formulating a checklist for educating pregnant women. Educating the pregnant women during antenatal and post-natal period increases knowledge on child development.

We expect your valuable contribution in formulating the tool, which will help us develop a checklist for new mothers. We assure you that all the details that you provide during the session will only be used for the purpose of research. Neither the details you share nor your identity will be disclosed anyone.

**GUIDE FOR DISCUSSION**

**PRELIMINARY DISCUSSION**

Can you tell me about yourself?

Probe for

Basic demographics

GPAL

Type of delivery – Normal or c section; Term or preterm birth

If preterm, was the child admitted in NICU

How long was the stay in NICU

Did you interact with your child in NICU

When did you start feeding your child? Was the child able to suck milk

Did your child hold your finger

What do you understand by the term developmental mile stones?

Provide general orientation to the term “development milestones, check list, screening list” to ensure that all participants have similar understanding

**BACKGROUND QUESTIONS**

Can you briefly share your experience as a mother from delivery till date?

Can you share about routine check-up/ health checkup/ well baby visits of your child?

Stimulate for

At what time points do you visit pediatrician?

**REHABILITATION**

At what age of your child, did you start rehabilitation of your child?

What was the purpose of your visit to rehabilitation/developmental therapy?

Stimulate for

How did you know your child required rehabilitation? (referred by self/ pediatrician/neonatologist/peers)

What are the early signs you noted, that mad you think your child needs a special attention.

Who identified the signs? (self/peer/doctor)

When it was identified, did you immediately reach out to doctor or did you wait for few more days/weeks to find if the child achieves it?

When you consulted the doctor, was the developmental signs explained to you?

If yes, how did they explain? (images, demonstration)

Following the identification, where did you approach OR where were you referred for rehabilitation? (developmental therapist/ physiotherapist.?)

**DEVELOPMENTAL MONITORING**

How do you monitor your child’s developmental progress?

Were you explained about key milestones to monitor in order to track you child’s developmental

If yes, what were the key areas you monitor at each month

**Probe for key mile stones**

**UPTO 3 MONTHS**

Gross – hands open/close; prone head lift, thumb adduction, kicking the legs, supported sitting, facial movements (grimaces, frowns, etc.,)

Fine – crossing hands to opposite side, grasp your finger/ toy, clasps hands together, did you child suck well (breast/ bottle)

Sensory motor – look and track the toys, turns to sound/when you call

Reflex – Did your child start to suck, did your child cry to loud noises, grasp your finger

Language and communication – ooo/aaah sounds, did he/she sound back to your voice, did she/he stopped crying to your voice.

Personal – Social – identifies you, smiles

Behavior: was it easy to console, did she/he smiled back at you

**4 TO 6 MONTHS**

Gross – Hands close/open, roll over, eye movements, prone on forearm, head up, kicking, sits with support at hip, stands with support, raises chest up on elbows, follows toy by moving head/eyes

Fine – holds toy/ grabs clothes, reaches to objects, holds toy for at-least 1 minute

Sensory motor – turn to voice/ rattles

Reflex – grabs fingers and toys, sucks to bottle, puts toys in mouth

Language and communication – excited when seeing you/toys, know to feed with bottle

Personal-social – Feeds self, works/asks for toy (waves hands towards toys)

**7 TO 9 MONTHS**

Gross – prone lying - bears weight of extended arms and legs, sits with support, able to take out the arms while rolling over, bears weight in supported standing, kicks in lying, crawls

Fine – grasps between thumb and finger, takes and passes objects/cubes/ toys

Sensory motor – responds to sounds/ turns to the direction of loud sounds

Reflex – Sucks and swallows

Language and communication – dada, mama

Personal social – waves bye, asks/ indicates its wants, feeds himself with biscuits, let go off toys

Behavior – Able to console, able to arouse

**10 TO 12 MONTHS**

Gross – Stands bearing weight without support, walks between chairs, sits from lying, rolls over, maintains head upright, grasps objects

Fine – bangs 2 objects in hands, picks up with one hand, able to keep objects in floor

Sensory motor – responds to sounds and familiar faces

Reflex –

Language and communication – calls da da, mama, ga ga or ba-ba, plays peaka-boo, answers question like “where is your shoe”

Personal social – plays with you, puts feet in mouth, drinks water from cup, feeds himself, gives toys

How do you track your child’s development? (checklist/booklet/monthly check up) Do you use any specific tool or specific methods to track the development

How did you come across the concept of milestones

How was it explained to you?

Were you educated about this during pregnancy or shortly after delivery?

Do you think, if these signs were thought to earlier (during pregnancy or shortly after delivery) it would have been even more useful?

How did the time of education or information share about milestones affected your journey and your child’s development and treatment?

From your perspective, when do you think that the information about development monitoring should ideally be delivered to mother?

What makes you think so?

If you were asked to suggest efficient ways to reach out this concept to pregnant mothers, what will it be?

**CLOSING QUESTIONS**

Thank you for sharing your valuable insights to develop the educational program for pregnant women. As we have reached end of our discussion, would like to share any experience or insight that we haven’t discussed yet?
