# Supplementary material for: Enhancing Parental Education on Early Childhood Developmental Monitoring: A Qualitative Exploration with Stakeholders
Source: Research Square preprint supplement (doi:10.21203/rs.3.rs-6671717/v1), 2025-06-17
Supplement: Supplementary file 2 [file 72ebd3fc6e093845eeb4a92a.docx]

TABLES

**Table 1: Demographic characteristics of mothers participated in the study**

| **Demographic Data** | **Frequency** | **Percentage** |
| --- | --- | --- |
| Maternal Age  20 - 25 years  26 - 30 years  31 - 35 years  36 - 40 years  41 - 45 years | 4  5  7  1  1 | 22.2  27.8  38.9  5.6  5.6 |
| Educational status of Mother  High School/ Secondary School  Diploma  Undergraduate  Post Graduate | 3  1  13  1 | 16.7  5.6  72.2  5.6 |
| Employment Status  Employed  House wife | 4  14 | 22.2  77.8 |
| Locality  Urban  Semi urban  Rural | 6  7  5 | 33.3  38.9  27.8 |
| No of Children  1  2 | 11  7 | 61.1  38.9 |
| Type of Delivery for the child availing rehabilitation  Labor Natural  C Section | 8  10 | 44.4  55.6 |
| History of NICU Stay of the Child availing rehabilitation  Yes  No | 13  5 | 72.2  27.8 |
| If yes for the previous question, Duration of NICU stay  Less than 5 days  6 - 10 days  11 - 20 days  21 - 30 days  More than 30 days | 3  2  5  2  1 | 23.1  15.4  38.5  15.4  7.7 |
| Current age of the Child availing rehabilitation  Less than 1 year  From 1 year to 2 years  From 3 years to 4 years | 6  6  6 | 33.3  33.3  33.3 |

**Table 2: Themes and sub-themes generated through inductive coding**

| **Selective Codes / themes** | **Axial Codes / sub-themes** | **Open Codes** |
| --- | --- | --- |
| Early screening and developmental monitoring | Crucial areas in assessment | Primitive reflexes, serve and return, all domains of development, retained primitive reflex, seizures |
| Parental awareness and concerns | Lack of awareness, peer/family-based input, prior experience, Lack of knowledge, self-guilt |
| Common signs noted by parents | Eye contact, recognition, responses, gross motor, feeding, communication, and sucking |
| Areas to be improved | High subjectivity of parent scales, most scales are HCP administered, respiratory signs, bladder/bowel, sleep, smile, regression of milestone, sustenance, early achievement of milestones, difficulty in selecting the appropriate age-specific tool |
| Monitoring and follow-up | Barriers to monitoring and follow up | Distance, lack of awareness, stigma, underreporting, paucity of knowledge, Lack of understanding, Balancing life (both the children) |
| Strategies to improve follow-up and adherence | Explain “whys”, Nudging, Google Calendar, concern calls, catchy terms, explain with real examples, provide checklists, Continuous motivation and monitoring strategy |
| Parental education | Need for parental education | Lack of professional check-in well babies, high load on HCP, lack of manpower, to fasten identification, difficulty in picking up all red flags in one session  Internet-based knowledge, lack of authenticated source, medical negligence, lack of input from HCP |
| Educational content | Only facts, basics of ND in the antenatal period, complications of delay in the post-natal period, go-to place, |
| Strategies for implementation | Group therapies involve partners, questions on lived experiences, and demonstrating on the child, combining all the parents in the same umbrella, Conducting frequent educational sessions |
| Ideal periods for parental education | 2nd trimester, before discharge, every visit, pre-conceptual counselling, vaccination periods, in NICU stay |
| Multimodal Education | Something is better than nothing, Posters/running videos in the waiting room, calendar-based pamphlets, short reels, demonstrations, sequential illustration, no more – no less, picture-based, draw diagrams  Add words which are easy to understand |
| Acceptance among parents | Educated> uneducated, urban> rural, parents of special children> normal children  Acceptance of child among family members |
| Primitive reflexes in parental education | Contrasting opinions, Moro, sucking, grasp and ATNR  Palmar and Plantar reflex |
| Embracing a transdisciplinary approach | Integration of care pathways | Continuity of professional care, guiding between visits, mutual referral, early intervention centre, accessibility  Reassurance of the same concept of education, recurrent team meetings, holistic approach-based FDPs |
| Expectations from the parents | Understanding the need, when and where to approach, bonding with the child, social interaction with the child, facilitating exposure to the social environment |

| **Table 3: Common signs noted by parents as described by the participants** |
| --- |
| Feeding  Swallowing  Weight gain  Head hold  Eye contact  Identifying parents  Holds breast or bottle  Turns prone  Sits without support  Follows with eyes  Turns to sound  Communication  Walking with support  Roll over |

| Table 4: Essential components to be added in Early screening of children below age of 1 year |
| --- |
| - Pre attainment of milestone - Milestone regression – Note for cause - Be specific - When prompted for smile, state how to elicit smile (spontaneous/responsive) - Respiratory and cardiological components - Sleep cycle - Seizures - Responds to command - Note the time he takes to respond - Check if he responds only to his favorite sound - Check 2 – 3 times in different time periods - Bladder and bowel - When it is a month-based assessment, mention if it is 4 weeks or 30 days - Tone assessment – Parent administered |

| **Table 5: Multiple methods of educating parents as described by HCPs and mothers** |
| --- |
| Posters in waiting room  Demonstration with parents  Sequential diagrammatic representation  Complete step by step instructions to perform and note a sign  Explaining with hand drawn diagrams  Send videos or notification at regular intervals  Opt for Short videos  Splitting education schedules according to month/needs  Provide as a calendar based check list that can be stuck to wall  Peer learning – Room for discussion with other mothers  Month specific booklets and check list  Educate every time they come with the educational material |
