# Supplementary material for: Enhancing Parental Education on Early Childhood Developmental Monitoring: A Qualitative Exploration with Stakeholders
Source: Research Square preprint supplement (doi:10.21203/rs.3.rs-6671717/v1), 2025-06-17
Supplement: Supplementary file 3 [file 78c5850dbe5457a053fc5521.docx]

**FOCUS GROUP DISCUSSION – HEALTH CARE PROFESSIONALS**

**BASIC INFORMATION\**

Name

Age/gender

Years of expertise

Domain

- Have you communicated about the Potential signs of developmental delay for mothers who come for check up in the first year of the child?
- How often do you discuss child development and potential signs of developmental delay with parents/expectant parents in your practice? (Obstetricians)
- Are there specific examples that you find helpful in illustrating developmental concepts to parents?"
- What challenges, if any, have you observed in communicating these concepts to parents? (Paediatricians and Physical Therapists)
- From your clinical experience, what are the key developmental milestones parents should be aware of during the early years? In your experience, what are common red flag sign or developmental stone that you teach a mother?
- What signs or red flags would you consider significant indicators of potential developmental delay?
- Which are timepoints that you think is optimal for developmental assessments? (28th day, 3rd month, 6th month, etc.,)
- Of these which time period you think is crucial for early identification to be referred to developmental therapy
- Which scales do you thinks will be more apt to detect developmental challenges? (on basis of sensitivity, easy to administer, freely available)

**REFLEXES**

- “Primitive reflexes serve as sign of neuromotor maturity”. What is your view on this statement?
- What are the important primitive reflexes that should be ideally assessed for developmental monitoring?
- If the reflexes have to be thought to the mother, which reflexes you think that will feasible and reliable for a mother to perform

**PARENTAL CONCERNS**

1. What kinds of activities (physical) or movements do parents or caregivers usually notice in a child to understand how they're growing and learning? Can you share examples?
2. When parents check how a child is growing up, what do they notice about how the child acts around others or expresses their feelings?
3. Are there specific behaviours that might worry parents about how their child is getting along with others or handling their feelings?

**TO SUMMARIZE THE DEVELOPEMENTAL SIGNS**

In a developmental surveillance for one year, what are the key points to be noted under each domain?

|  | 0-3 months | 4-6 months | 7-9 months | 10-12 months |
| --- | --- | --- | --- | --- |
| Fine motor |  |  |  |  |
| Gross motor |  |  |  |  |
| Sensory motor |  |  |  |  |
| Reflexes |  |  |  |  |
| Communication |  |  |  |  |
| Social/behavior |  |  |  |  |
| Neurological signs |  |  |  |  |
| Other (specify) |  |  |  |  |

**Evaluation of Existing Educational Materials:**

**1. Current Usage:**

- Do you currently use any educational materials or resources when discussing child development with expectant parents?
- If yes, can you please explain the components in it?

2. **Recommendations for Improvement:**

- Based on your experience, what recommendations do you have for improving or enhancing existing educational materials on child development?
- What are the barriers faced while implementing the educational tools or why do you think it has not been used so far
- Which method of education will be more effective for mothers to grasp? (Images/videos/ demonstrations)
- Cards with developmental milestones are being issued in GH. What is your views on that?

**IMPLEMENTING EDUCATIONAL MODULE**

In your experience, do you educate mothers about tracking developmental mile stones

In your opinion. Which method of implementation will be easily reachable and comprehensible by mother? (videos/demonstrations/pamphlets)
