# Supplementary material for: Enhancing Parental Education on Early Childhood Developmental Monitoring: A Qualitative Exploration with Stakeholders
Source: Research Square preprint supplement (doi:10.21203/rs.3.rs-6671717/v1), 2025-06-17
Supplement: Supplementary file 4 [file 83752ec751eef51171354c82.docx]

**FOCUS GROUP DISCUSSION WITH OBSTETRICIANS**

Dear Sir/ Madam, I welcome you on behalf of our Research Team. We are conducting research to study the effectiveness of training that will be provided to women before their delivery to identify the early signs of developmental delay in their children. In this situation, we are gathering insights from healthcare professionals like Obstetricians, Paediatricians and Physical Therapists to develop a tool or module or checklist to inform antenatal women on signs of developmental delay. Your valuable insights and opinions are highly valid which will be very helpful shaping effective educational initiatives. We will maintain a confidentiality with the data collected from you and the interview will be recorded if you are comfortable.

**Basic Information:**

Name:

Age:

Gender:

Years of experience as an obstetrician:

Current practice setting (hospital, clinic, etc.):

**Background Questions:**

How do you perceive the importance of educating expectant mothers about early childhood development during prenatal care?

Could you share your approach to integrating early childhood development education into routine prenatal care visits?

**Expectant Mothers' Awareness:**

From your experience, to what extent are expectant mothers aware of the significance of monitoring their child's development during infancy?

Do you think this could have an impact on child’s development

What common misconceptions or gaps in knowledge do you observe among expectant mothers regarding early developmental signs and milestones?

How do cultural or socio-economic factors influence expectant mothers' understanding and engagement with early childhood development education? (based on family: nuclear/joint, number of delivery)

**Communication Strategy:**

How do you initiate discussions about early childhood development with expectant mothers during prenatal appointments?

How do mothers react or respond to it?

What key information or messages do you prioritize conveying to expectant mothers about early developmental milestones and reflexes?

Can you explain, why specifically these milestones are emphasized

Can you describe any specific strategies you employ to ensure that expectant mothers comprehend and retain information about early childhood development?

How do you tailor your communication approach to accommodate expectant mothers with diverse educational backgrounds or language preferences?

Do you seek feedback from expectant mothers regarding the effectiveness of early childhood development education provided during prenatal care visits?

How do you incorporate feedback from expectant mothers to continuously improve the delivery of early childhood development education in your practice?

**Educational Resources:**

What resources or educational materials do you provide to expectant mothers to enhance their understanding of early childhood development?

Are there any community programs or resources you recommend to expectant mothers for further education or support related to early childhood development?

How do you encourage expectant mothers to engage with educational materials or resources outside of prenatal appointments?

Do you think that expectant mothers have access to reliable and culturally appropriate online resources for learning about early childhood development? Kindly elaborate

**Monitoring and Observation:**

How do you emphasize the role of expectant mothers in monitoring their child's development during infancy?

How do you encourage expectant mothers to actively engage in their child's developmental journey beyond prenatal visits?

Can you share instances where mothers have successfully identified early developmental concerns based on your education and guidance?

Do you offer postpartum follow-up or support to reinforce early childhood development education after delivery?

How do you address any challenges or barriers expectant mothers may encounter in applying early childhood development principles postpartum?

Do you provide guidance on specific techniques or methods for expectant mothers to observe and track their child's developmental milestones at home?

How do you address concerns or anxiety that expectant mothers may have about their ability to accurately monitor their child's development?

**Referral and Support:**

When do you typically advise expectant mothers to seek further evaluation or support for early developmental concerns?

How do you facilitate referrals to appropriate healthcare providers or early intervention services for expectant mothers concerned about their child's development?

Do you provide expectant mothers with information about available support services or community resources for families with children who may have developmental delays?

**Professional Collaboration:**

Do you collaborate with other healthcare professionals, such as pediatricians or developmental specialists, to ensure comprehensive care for expectant mothers and their children?

What challenges, if any, have you encountered in coordinating care or referrals related to early childhood development?

How do you communicate with other healthcare providers to ensure continuity of care for expectant mothers and their children, especially regarding developmental concerns?

**Closing Thoughts:**

Is there anything else you'd like to share about your role in educating expectant mothers about early childhood development?

Do you have any suggestions for improving the integration of early childhood development education into prenatal care services? What steps do you believe are necessary to continue improving outcomes for expectant mothers and their children?
