# Supplementary material for: Enhancing Parental Education on Early Childhood Developmental Monitoring: A Qualitative Exploration with Stakeholders
Source: Research Square preprint supplement (doi:10.21203/rs.3.rs-6671717/v1), 2025-06-17
Supplement: Supplementary file 5 [file 975547c2e44b24fd0951b0bc.docx]

**FOCUS GROUP DISCUSSION WITH PHYSIOTHERAPISTS**

Dear Sir/ Madam, I welcome you on behalf of our Research Team. We are conducting research to study the effectiveness of training that will be provided to women before their delivery to identify the early signs of developmental delay in their children. In this situation, we are gathering insights from healthcare professionals like Obstetricians, Paediatricians and Physical Therapists to develop a tool or module or checklist to inform antenatal women on signs of developmental delay. Your valuable insights and opinions are highly valid which will be very helpful shaping effective educational initiatives. We will maintain a confidentiality with the data collected from you and the interview will be recorded if you are comfortable.

**Participant information**

Name

Age

Expertise

Years of experience

**Introductory Questions:**

Child development involves acquiring physical, cognitive, language, social, and adaptive skills. Potential signs of developmental delay include persistent difficulties or regressions in these areas. Early identification is crucial for timely intervention and support. Healthcare professionals play a key role in evaluating and addressing developmental concerns.

What is view points on early screening and early rehabilitation?

When do we call it early?

At what age of the child do parents commonly report to you for rehabilitation?

How do they reach out? (self-referred/doctor/peer)

What made them to reach out for help? i.e. what signs or behavior of the child bothered them to report for help?

When they reach out to rehabilitation, what are the understandings and expectations

How often do you explain the developmental concepts to

Are there specific examples that you find helpful in illustrating developmental concepts to parents?"

What challenges, if any, have you observed in communicating these concepts to parents? (Paediatricians and Physical Therapists)

From your clinical experience, what are the key developmental milestones parents should be aware of during the early years? In your experience, what are common red flag sign or developmental stone that you teach a mother?

What signs or red flags would you consider significant indicators of potential developmental delay?

Which are timepoints that you think is optimal for developmental assessments? (28th day, 3rd month, 6th month, etc.,)

Of these which time period you think is crucial for early identification to be referred to developmental therapy

Do you use any standard scales as routine part of your clinical assessment?

**If yes,**

What are the scales you use?

What are the reasons behind choosing this scale?

Did you find any barriers on challenges in using the scale? If so what are the challenges

From your perspective, which scale would be apt in identifying early red flag signs for a child from 0 to 12 months of age? (In terms of sensitivity, cultural competency, longitudinal monitoring, time consumption, user friendliness, parental tool and accessibility)

According to you, which scale do you recommend for monitoring the progression of child right from birth? (sensitive to minimal changes)

**If No,**

Why you prefer not to use scales

What are the other alternatives you suggest, i.e, if not a specific scale, in what way do yu assess the child/ what are the other ways to assess the child?

We have conducted an extensive review and have identified ten commonly used and accessible scales in literature for assessing the neuromotor development of infants up to 1 year of age. We have enlisted it below. Kindly share your view points on those scales

General Movement Assessment; Alberta Infant Motor Profile; Denver Developmental Screening Test II; Neuro-Sensory Motor Developmental Assessment; Ages and Stages 3; Hammersmith Neonatal Neurological Examination; Amiel Tison; INFANIB; Hammersmith Infant Neurological Examination; Premie neuro

**REFLEXES**

- “Primitive reflexes serve as sign of neuromotor maturity”. Do you think primitive reflexes are important?
- What are the important primitive reflexes that should be ideally assessed for developmental monitoring?
- If the reflexes have to be thought to the mother, which reflexes you think that will be feasible and reliable for a mother to perform and report

**PARENTAL CONCERNS**

1. What kinds of activities (physical) or movements do parents or caregivers usually notice in a child to understand their growth, development and learning? Can you share examples?
2. When parents check child’s growth, what do they notice about how the child acts around others or expresses their feelings?
3. Do you think parents worry about child behaviour especially with regards to socialisation? If yes, can you provide some example.

**Evaluation of Existing Educational Materials:**

**1. Current Usage:**

- Do you currently use any parental educational materials or resources when discussing child development parents?
- If yes, can you please explain the components in it? Could you share with us the material?

2. **Recommendations for Improvement:**

- Based on your experience, what recommendations do you have for improving existing educational materials towards child development?
- What are the barriers faced while implementing the educational tools or why do you think it has not been used so far
- Which method of education will be more effective for mothers to grasp? (Images/videos/ demonstrations)
- Cards with developmental milestones are being issued in GH. What are your views on that?
  - Do you think it is effective among parents

**IMPLEMENTING EDUCATIONAL MODULE**

In your experience, do you educate mothers about tracking developmental mile stones

In your opinion. Which method of implementation will be easily reachable and comprehensible by mother? (videos/demonstrations/pamphlets)

**TO SUMMARIZE THE DEVELOPEMENTAL SIGNS**

In a developmental surveillance for one year, what are the key points to be noted under each domain?

|  | 0-3 months | 4-6 months | 7-9 months | 10 – 12 months |
| --- | --- | --- | --- | --- |
| Gross motor |  |  |  |  |
| Fine motor |  |  |  |  |
| Senory motor |  |  |  |  |
| Reflex |  |  |  |  |
| Posture |  |  |  |  |
| Communication |  |  |  |  |
| Behavior |  |  |  |  |
| Neurological signs |  |  |  |  |
| Others |  |  |  |  |

**0-3 Months**

**Fine motor**: Follow midline and past midline, hands together, closing of fist, grasping, holds toys, reach to objects

**Gross motor:** Hands closed and open, in prone: lifts head by 45 to 90 degree, to turn head, sits supported, head steady, spontaneous thumb activity/ abduction, crawls on elbow, eye movements, facial movements (frowns/grimaces)

**Sensory motor:** Postural reaction, fix and track, reacts to sound (rattle)

**Reflexes:** Non-nutritive sucking, DTR, gag/suck, palmar and plantar rasp, moro reflex, startle and ventral suspension

**Postural:** Placing hands and feet, Head righting

**Communication:** vocalises, laughs, squeals, oo/aah, smiles at parents

social/personal – Regards face, smiles responsively, smiles sponataneously, smiles at mirror

**Behavior:** Alertness, irritability, consolability

**Neurological signs:** Scarf sign, heel to ear, popliteal angle, leg abduction, dorsiflexion, recoil (upper and lower limb), popliteal angle, dorsal and ventral incurvation, basic tone.

Problem solving: follows objects, moves toy side to side, waving towards toy, puts toy in mouth

**4-6 Months**

**Fine motor**: Grasp, reaches, regards raisins, open/closes hands, wave to toy, holds toy for 1 minutes

**Gross motor:** Hands closed and open, Prone in forearm: lifts head by 90 degree, standing weight bearing, spontaneous kicking (arms and legs), support on elbow, supported sitting and standing, roll over, pull to sit(no head lag), sits with support, crawls, holds head straight, hands together

**Sensory motor:** turn to voice and rattle, oculomotor – visual response

**Reflexes:** Foot reflex, TLR (supine and prone), ATNR, positive support reaction, crossed extension, Galant, abdominal, moro, ventral suspension, vertical suspension, arm protection

**Postural:** Body derorative, head righting, landu, observation

**Communication:** Single syllables, imitates speech sound, chuckles softly, stops crying as it hears mother’s voice, excited by sight of parents, makes sound when seeing people/toys, high pitched squeals, plays with sounds, makes da, ga, ka and ba sound

**social/personal** – work for toy, feed self, plays with finger, smiles backs, hold bottle or breast while feeding, smiles at mirror, reacts differently at strangers, grabs foot, foot to mouth

**Behaviour:** Conscious state, emotional state and social orientation

**Neurological signs:** Pull to sitting, scarf sign, heel to ear, popliteal angle, leg abduction, dorsiflexion, adductor angle, passive shoulder elevation, biceps jerk, knee jerk, crossed response – hip adductors

**Problem solving:** Reaches to object with both the hands, turns towards the toy he dropped, picks the toy he droppers, pass toys from hands to hands, bangs toy

**7-9 Months**

**Fine motor**: Grasp (type and quality), pass cube, takes 2 cubes, thumb finger grasp, holds a toy, picks up with only one hand, picks up string between first finger and thumb, able to keep the toy down without dropping it and takes her hand off

**Gross motor:** Hand closed/opened, pull to sitting, prone – bears weight on extended arms, sits without support, standing – weight bearing, pull to supine, supported standing, assisted walking, rolling, get to sitting, pull to stand, head maintained upright all the time, kicks in supine, walking – bouncing, holds on to support

**Sensory motor:** Eye follow, convergence, eye hand co-ordination, auditory response

**Reflexes:** Foot grasp, TLR, ATNR, parachute, Moro, Galant, Adductor reflex, sucking, swallowing, vertical suspension

**Postural:** Body derotative, positive support reaction, head righting, Landau, protective extension arms

**Communication:** Dada/mama non-specific, combine syllables, jabbers, turns to voice, checks for the direction of sound, imitates sounds, responds to commands

**social/personal:** Waves bye-bye, indicates wants, plays by grabbing her foot, reach out to pat mirror, tries to get toy tat is out of reach, drinks wate from cup when holded, feeds himself, pushes arm through sleeves

**Behaviour:** Social orientation, emotional regulation and conscious state

**Neurological signs:** Scarf sign, heel to ear, popliteal angle, leg abduction, dorsiflexion of foot, passive shoulder elevation, pull to sit, tendon reflexes

**Problem solving:** picks toy, puts in mouth, tries to get a toy it dropped, bangs toy on tables, holds 1 toy in each hand for at-least 1 minute, pat a cake, find toy hidden under cloth.

**10 – 12 Months**

**Fine Motor:** Type of grasp, Manipulative ability, Awareness of two hands, pick up small toy with one hand, with fingers and with thumb, pick up piece of string, throw small ball with forward motion, turn the pages of book

**Gross Motor:** Hands closed/Opened-open, pull to sitting, prone- stands up through plantigrade, sitting-sitting position, standing-weight bearing, basic posture supine, sit from supine, sitting, rolling, prone progression, standing, cruising (Furniture walking), walking, stand 2 seconds, facial appearance, eye movements, head control- maintained upright all the time (normal from 5m), sitting-With Stable sit, pivots, voluntary grasp-note side, ability to kick in supine, rolling-note through which sides- rolling to side, prone to supine, supine to prone, crawling-note if bottom shuffling- crawling on hands and knees(normal at 10), standing-stands unaided(normal at 12m), walking-Cruising (walks holding on)- normal at 12m, walking independently(normal by 15m), support her own weight while standing, sit up straight, leaning her chest against the furniture for support, bend down and pickup toy from the floor and return to standing without falling or flopping down, walk beside furniture while holding on with only one hand

**Sensory Motor:** Body rotative, tactile, vestibular – oculomotor reflex, postural reaction, oculomotor – eye follow (Horizontal, vertical, circular, convergence), rolling ball test, eye-hand coordination, visual response, auditory response

**Reflexes:** Foot grasp, tonic Labyrinthine supine, asymmetric tonic neck reflex (ATNR), tonic Labyrinthine prone, sideways parachute, backwards parachute, suspended – forward parachute, integration, sucking/swallowing, arm protection, vertical suspension, lateral tilting, forward parachute, tendon reflexes - Knee extensors, elbow flexors and hip adductors

**Postural:** Body de-rotative, positive support reaction, head righting – vertical, forward, back, side, horizontal, prone, supine, side, landau (Full trunk and hip extension) – arms – forward, back, side, landau (Full trunk and hip extension) – Parachute (reaction in legs), head -in sitting, trunk-in sitting, arms- at rest, hands, legs- in sitting, in supine and in standing, feet – in supine and in standing.

**Communication:** Dada/mama – specific, makes sounds, repeat the sounds, make two similar sounds like ba-ba, da-da, play one nursery game, follow one simple command, says three words, looks for the object when asked, points thing when wanted

**Behaviour:** Conscious state, emotional state, social orientation, conscious state, emotional state, social orientation

**Personal-Social:** Play pat a cake, play with examiner, put her foot in mouth, drink water or juice, feed himself, hold out and ask for toy and let it go of in your hand, when dressed does push arm through the sleeve, lift foot for shoe, socks, roll or throw ball back, play with doll by hugging it

**Neurological Signs:** Scarf sign, heel to ear, popliteal angle, leg abduction, dorsiflexion of foot, hip adductor, passive shoulder elevation, pronation/supination, pull to sit

**Problem Solving:** Pass a toy back and forth, pick up two small toys, holding toy can bang against another toy on table, clap the toys together, try to get a crumb, can find toys hidden, put toy into bowl, copy you by scribbling
