# Supplementary material for: Enhancing Parental Education on Early Childhood Developmental Monitoring: A Qualitative Exploration with Stakeholders
Source: Research Square preprint supplement (doi:10.21203/rs.3.rs-6671717/v1), 2025-06-17
Supplement: Supplementary file 6 [file df5b1eddbbe10b735517d17c.docx]

**FOCUS GROUP DISCUSSION WITH DEVELOPMENTAL PEDIATRICIANS**

Dear Sir/ Madam, I welcome you on behalf of our Research Team. We are conducting research to study the effectiveness of training that will be provided to women before their delivery to identify the early signs of developmental delay in their children. In this situation, we are gathering insights from healthcare professionals like Obstetricians, Paediatricians and Physical Therapists to develop a tool or module or checklist to inform antenatal women on signs of developmental delay. Your valuable insights and opinions are highly valid which will be very helpful shaping effective educational initiatives. We will maintain a confidentiality with the data collected from you and the interview will be recorded if you are comfortable.

Basic Information:

Name:

Age:

Gender:

Years of expertise:

Medical specialization:

**BACKGROUND QUESTIONS**

Can you share a brief overview of your approach to assessing and addressing developmental concerns in children

In your practice, how critical do you consider early screening and intervention for developmental delays?

Do you think it is critical for a parent to learn about developmental milestone rather than just bringing to routine check-ups? Why do you think so?

How often do you encounter parents concerned about their child's developmental milestones during routine check-ups?

Can you describe the typical age range when parents commonly seek your advice regarding their child's development?

What are the most common reasons parents bring their children to you regarding developmental concerns

Could you share any specific instances where you found certain developmental concepts particularly challenging to communicate to parents? If yes, what were they?

**KEY MILESTONES**

From your clinical experience, what are the key developmental milestones parents should be aware of during the early years?

Can you elaborate common red flags or developmental signs that you often discuss with parents based on the age of child (or) Can you provide examples of red flags or warning signs that parents should be particularly vigilant about?

How do you emphasize the significance of these early developmental signs to parents during routine check-ups?

At what timepoints do you usually recommend developmental assessments during the child's first year?

How do you guide parents in monitoring their child's development between visits and recognizing potential red flags

**Primitive Reflexes:**

In your experience, how do primitive reflexes contribute to the overall assessment of a child's neuromotor development?

Can you share any specific instances where abnormalities in primitive reflexes have provided valuable insights into a child's developmental trajectory?

When discussing primitive reflexes with parents, how do you convey the significance of these reflexes in their child's development?

Have you encountered cases where abnormalities in primitive reflexes have prompted further investigation or intervention? If so, could you provide an example?

**OUTCOME MEASURES**

Do you incorporate any standardized assessment scales as a routine part of your clinical practice?

If yes:

Which scales do you use and why? Which scale(s) do you find most effective in identifying early red flag signs or developmental delays?

Have you encountered any shortcomings or limitations with the use of these scales?

If no:

What alternatives do you suggest for assessing neuromotor development in children?

How do you tailor your assessments to meet the individual needs of each child and family

In our review, we have identified few scales that are easily accessible. Kindly share your views on these scales:

General Movement Assessment; Alberta Infant Motor Profile; Denver Developmental Screening Test II; Neuro-Sensory Motor Developmental Assessment; Ages and Stages 3; Hammersmith Neonatal Neurological Examination; Amiel Tison; INFANIB; Hammersmith Infant Neurological Examination; Premie neuro

**Evaluation of Existing Educational Materials:**

Do you currently utilize any educational materials or resources when discussing child development with expectant parents?

If yes:

Could you elaborate on the components included in these materials?

If no:

What do you perceive as barriers to implementing educational tools in your practice?

What improvements or enhancements would you recommend for existing educational materials on child development?

What are your thoughts on the effectiveness of issuing cards with developmental milestones to parents?

**Implementing Educational Modules:**

In your experience, do you actively educate parents about tracking developmental milestones?

Can you briefly describe your approach to educating parents about early developmental signs and milestones

How do you educate and support parents in understanding and addressing their child's developmental challenges?

What resources or strategies do you find most effective in empowering parents to advocate for their child's needs?

Can you provide examples of positive outcomes resulting from parental involvement and support?

From your perspective, which method of implementation would be most accessible and comprehensible for parents? (e.g., videos, demonstrations, pamphlets)

**Interventions and Treatment:**

What types of interventions or treatments do you typically recommend for children with developmental delays or disorders?

How do you involve parents and caregivers in the intervention process?

Can you provide examples of successful interventions you've implemented and their impact on a child's development?

**Collaboration and Referral:**

When do you typically refer children to other specialists or services, such as therapists or early intervention programs?

How do you facilitate collaboration and communication between different healthcare providers involved in a child's care?

Can you share any insights on the importance of early intervention and interdisciplinary collaboration in improving outcomes for children with developmental needs?
